# Supplementary material for: Application of dyes as doping agents in MALDI-MS matrices for the signal enhancement of proteins
Source: Royal Society of Chemistry journal article supplement (doi:10.1039/c6ra27156a), 2017-01-01
Supplement: c6ra27156a1.pdf [file c6ra27156a1.pdf]

## **Application of dyes as doping agents in MALDI-MS matrices for the signal enhancement of proteins**

Arslan Ali,<sup>a</sup> Najia Shahid,<sup>a</sup> and Syed Ghulam Musharraf<sup>a, b,\*</sup>

*a: H.E.J. Research Institute of Chemistry, International Center for Chemical and Biological Sciences, University of Karachi, Karachi-75270, Pakistan*

*b: Dr. Panjwani Centre for Molecular Medicine and Drug Research, International Center for Chemical and Biological Sciences, University of Karachi, Karachi-75270, Pakistan*

### **Supplementary Material**

\*Corresponding author. Tel.: +92 21 4824924-5; 4819010; fax: + 92 21 4819018-9.

*E-mail address:* [musharraf1977@yahoo.com](mailto:musharraf1977@yahoo.com)

## **Legend**

**Table S1** MALDI-MS data of bovine serum albumin (BSA) analysed with and without dyes.

**Table S2** MALDI-MS data of myoglobin analysed with and without dyes.

**Table S3** MALDI-MS data of insulin analysed with and without dyes.

**Table S4** MALDI-MS data of casein analysed with and without dyes.

**Method S1** Description of spotting plan generation and statistical analysis.

**Figure S-1** MALDI-MS spectra of myoglobin analysed with matrices A) HCCA, B) SA and C) DHB with dyes (A-E) and without dyes.

**Figure S-2** Graphs showing A) Intensity, B) S/N ratio, C) Resolution, and D) Area of myoglobin observed in MALDI-MS spectra vs. Matrix and Dyes used for analysis.

**Figure S-3** MALDI-MS spectra of insulin analysed with matrices A) HCCA, B) SA and C) DHB with dyes (A-E) and without dyes.

**Figure S-4** Graphs showing A) Intensity, B) S/N ratio, C) Resolution, and D) Area of insulin observed in MALDI-MS spectra vs. Matrix and Dyes used for analysis.

**Figure S-5** MALDI-MS spectra of casein analysed with matrices A) HCCA, B) SA and C) DHB with dyes (A-E) and without dyes.

**Figure S-6** Graphs showing A) Intensity, B) S/N ratio, C) Resolution, and D) Area of casein observed in MALDI-MS spectra vs. Matrix and Dyes used for analysis.

**Figure S-7** MALDI-MS spectra of egg white sample analysed with HCCA with and without dyes (A-E) for the possible detection of proteins.

**Figure S-8** MALDI-MS spectra of egg white sample analysed with DHB with and without dyes (A-E) for the possible detection of proteins.

**Figure S-9** MALDI-MS spectra of honey sample analysed with HCCA with and without dyes (A-E) for the possible detection of polydispersed carbohydrates/ proteins.

**Figure S-10** MALDI-MS spectra of honey sample analysed with DHB with and without dyes (A-E) for the possible detection of polydispersed carbohydrates/ proteins.

**Figure S-11** MALDI-MS spectra of honey sample analysed with SA with and without dyes (A-E) for the possible detection of polydispersed carbohydrates/ proteins.

**Data S1** Statistical Data for Bovine Serum Albumin analysis.

**Data S2** Statistical data for myoglobin analysis.

**Data S3** Statistical data for casein analysis.

**Data S4** Statistical data for insulin analysis.

**Method S1** Description of spotting plan generation and statistical analysis.

The sample/spotting plan was generated using fractional factorial design (Design Expert v 9.0, Stat-Ease, Minneapolis, MN, USA). After an initial screening to identify limitations in the factor-space, the type of dye, dye concentrations, and mass range, were varied according to a face-centred central composite design (CCF). This design allows modelling of quadratic functions of the factors, using fewer experiments compared to a three-level full-factorial design. Statistical analysis was performed, such as ANOVA and t-test using the same software to study the both individual and combined effects of different factors.

**Table S1** MALDI-MS data of bovine serum albumin (BSA) analysed with and without dyes.

| Dye         | HCCA*          |           |       |            |          | DHB**          |           |      |            |         | SA***          |           |       |            |         |
|-------------|----------------|-----------|-------|------------|----------|----------------|-----------|------|------------|---------|----------------|-----------|-------|------------|---------|
|             | Dye Conc. (pM) | Intensity | S/N   | Resolution | Area     | Dye Conc. (pM) | Intensity | S/N  | Resolution | Area    | Dye Conc. (pM) | Intensity | S/N   | Resolution | Area    |
| A           | 0.1            | 15341     | 129.9 | 90         | 17137108 | 100            | 5214      | 73.5 | 58         | 7789449 | 1              | 7348      | 169.5 | 90         | 7682927 |
|             | 1              | 11411     | 101.7 | 81         | 13614231 | 10             | 4898      | 74.9 | 73         | 6526343 | 0.1            | 4952      | 133.4 | 99         | 5280801 |
|             | 100            | 9410      | 106.8 | 74         | 12376452 | 100            | 4283      | 63.9 | 62         | 6251725 | 0.1            | 4546      | 109.3 | 83         | 5184041 |
| B           | 10             | 23837     | 162.4 | 89         | 26941357 | 100            | 3176      | 42.7 | 36         | 5956328 | 10             | 5192      | 126.5 | 97         | 5160130 |
|             | 100            | 16913     | 126.7 | 85         | 20023906 | 1              | 4128      | 70.8 | 61         | 5948368 | 0.1            | 4363      | 115.5 | 89         | 4766991 |
|             | 1              | 12668     | 122.6 | 88         | 14288375 | 100            | 3021      | 53.5 | 49         | 5099726 | 100            | 3230      | 71.2  | 88         | 3661930 |
| C           | 100            | 16437     | 127.1 | 82         | 19879914 | 10             | 5276      | 72.9 | 59         | 7705529 | 1              | 6789      | 154.4 | 66         | 8991997 |
|             | 1              | 14937     | 121.7 | 83         | 17665216 | 0.1            | 4508      | 66.6 | 61         | 6613203 | 0.1            | 8370      | 178.8 | 157        | 8936447 |
|             | 0.1            | 11552     | 130.6 | 99         | 12098975 | 1              | 4243      | 64.4 | 62         | 6234510 | 1              | 3675      | 106.1 | 92         | 3793863 |
| D           | 1              | 16124     | 136.1 | 90         | 17872093 | 100            | 4712      | 71.4 | 66         | 6500254 | 10             | 9108      | 179   | 92         | 9593021 |
|             | 10             | 9832      | 112.3 | 72         | 13061084 | 10             | 4017      | 63   | 58         | 6145665 | 1              | 5841      | 136.6 | 97         | 5909756 |
|             | 0.1            | 10696     | 105.8 | 87         | 12272311 | 0.1            | 4205      | 64   | 72         | 5657242 | 10             | 4109      | 129.4 | 91         | 4368477 |
| E           | 0.1            | 13006     | 127.7 | 91         | 14426946 | 1              | 5214      | 73.5 | 58         | 7789449 | 10             | 6496      | 138.3 | 78         | 7407662 |
|             | 1              | 10937     | 111.5 | 86         | 12919051 | 10             | 5508      | 80.1 | 72         | 7160957 | 1              | 5958      | 153   | 41         | 6542150 |
|             | 100            | 9452      | 111.4 | 80         | 11792833 | 100            | 3210      | 53.8 | 46         | 5508620 | 10             | 5786      | 150.5 | 59         | 5629486 |
| Without Dye | -              | 2615      | 45.3  | 77         | 3394878  | -              | 432       | 16.4 | 76         | 1037062 | -              | 2629      | 83.2  | 94         | 2795285 |
|             | -              | 2929      | 47    | 70         | 3786127  | -              | 581       | 18.4 | 64         | 1443673 | -              | 2788      | 99.5  | 93         | 2879131 |
|             | -              | 3216      | 49.8  | 73         | 4087796  | -              | 612       | 26.9 | 84         | 776639  | -              | 1964      | 87.8  | 100        | 1933579 |

Laser Intensity (%): \*50, \*\*60, \*\*\*60

**Table S2** MALDI-MS data of myoglobin analysed with and without dyes.

| Dye         | HCCA*          |           |       |            |          | DHB**          |           |       |            |        | SA***          |           |        |            |        |
|-------------|----------------|-----------|-------|------------|----------|----------------|-----------|-------|------------|--------|----------------|-----------|--------|------------|--------|
|             | Dye Conc. (pM) | Intensity | S/N   | Resolution | Area     | Dye Conc. (pM) | Intensity | S/N   | Resolution | Area   | Dye Conc. (pM) | Intensity | S/N    | Resolution | Area   |
| A           | 1              | 50758     | 376.6 | 208        | 7070808  | 0.1            | 13629     | 476.7 | 1180       | 432457 | 0.1            | 20325     | 1037.3 | 1237       | 440640 |
|             | 1              | 50758     | 376.6 | 208        | 7070808  | 100            | 14767     | 401.8 | 1296       | 347441 | 1              | 17801     | 992.7  | 1271       | 385903 |
|             | 10             | 49481     | 401.6 | 235        | 6559161  | 10             | 11829     | 358.9 | 1356       | 275395 | 100            | 15480     | 913.2  | 1195       | 336568 |
| B           | 10             | 79324     | 544.5 | 329        | 8722598  | 100            | 19465     | 530.8 | 1333       | 460513 | 100            | 22994     | 1187.8 | 1173       | 519320 |
|             | 10             | 56809     | 494.5 | 328        | 6079946  | 0.1            | 17436     | 589   | 1331       | 414460 | 100            | 23551     | 1221.7 | 1257       | 503054 |
|             | 0.1            | 38368     | 394.5 | 269        | 4569212  | 1              | 15528     | 491.1 | 1307       | 373268 | 0.1            | 21487     | 1189.1 | 1239       | 486959 |
| C           | 0.1            | 46568     | 405.5 | 218        | 6401869  | 1              | 14570     | 459.2 | 1307       | 349786 | 100            | 35732     | 1499.6 | 1245       | 795324 |
|             | 10             | 52680     | 419.7 | 267        | 6261088  | 0.1            | 11287     | 383.8 | 1290       | 272489 | 10             | 26143     | 1304.9 | 1250       | 581440 |
|             | 0.1            | 46290     | 454.5 | 265        | 5458069  | 100            | 11595     | 381.8 | 1388       | 271221 | 0.1            | 20523     | 1164.6 | 1199       | 478987 |
| D           | 10             | 84674     | 436.4 | 231        | 11019018 | 1              | 15425     | 448.5 | 1293       | 382366 | 0.1            | 24711     | 1180.9 | 1284       | 531706 |
|             | 0.1            | 64297     | 386.8 | 233        | 8612477  | 100            | 13499     | 422.3 | 1249       | 339968 | 100            | 22680     | 1214.7 | 1211       | 510497 |
|             | 0.1            | 54587     | 374.6 | 259        | 6755594  | 10             | 8874      | 435.6 | 1435       | 181950 | 0.1            | 20615     | 1169.5 | 1264       | 433612 |
| E           | 100            | 69505     | 276.1 | 213        | 9779422  | 0.1            | 10341     | 317.8 | 1284       | 257574 | 0.1            | 34095     | 1443.7 | 1225       | 771126 |
|             | 0.1            | 49848     | 425.4 | 260        | 6185621  | 1              | 10420     | 395.4 | 1355       | 236784 | 10             | 27080     | 1342.6 | 1203       | 641839 |
|             | 100            | 42113     | 411.1 | 239        | 5210450  | 0.1            | 10461     | 356.8 | 1364       | 233011 | 100            | 19941     | 1128.3 | 1251       | 428944 |
| Without Dye |                | 32104     | 347.6 | 545        | 325753   |                | 11654     | 163.9 | 665        | 233823 |                | 20145     | 1014   | 1096       | 301498 |
|             |                | 44351     | 423.8 | 516        | 642863   |                | 12604     | 162.2 | 886        | 183557 |                | 17874     | 972.6  | 1046       | 285911 |
|             |                | 14485     | 220.7 | 659        | 58388    |                | 13797     | 254.3 | 886        | 204701 |                | 26273     | 1309.3 | 1174       | 397049 |

Laser Intensity (%): \*40, \*\*45, \*\*\*45

**Table S3** MALDI-MS data of insulin analysed with and without dyes.

| Dye         | HCCA*     |           |       |            |        | DHB**     |           |       |            |       | SA***     |           |       |            |        |
|-------------|-----------|-----------|-------|------------|--------|-----------|-----------|-------|------------|-------|-----------|-----------|-------|------------|--------|
|             | Dye Conc. | Intensity | S/N   | Resolution | Area   | Dye Conc. | Intensity | S/N   | Resolution | Area  | Dye Conc. | Intensity | S/N   | Resolution | Area   |
| A           | 0.1       | 7247.4    | 107.7 | 305        | 675370 | 100       | 542.93    | 79.1  | 682        | 24195 | 10        | 2510.09   | 270.2 | 718        | 110664 |
|             | 100       | 4275.31   | 92    | 255        | 482033 | 10        | 400.2     | 44.4  | 614        | 18985 | 100       | 1882.62   | 223.6 | 725        | 81929  |
|             | 100       | 4190.04   | 67.4  | 262        | 452627 | 0.1       | 402.79    | 62.6  | 695        | 17186 | 0.1       | 2739.35   | 326.8 | 680        | 126954 |
| B           | 100       | 5571.08   | 107.7 | 271        | 589642 | 0.1       | 586.19    | 72.4  | 639        | 27406 | 1         | 2990.33   | 252.2 | 674        | 138745 |
|             | 100       | 4098.76   | 79.4  | 240        | 475840 | 100       | 499.61    | 48.1  | 639        | 22612 | 1         | 2229.73   | 292.1 | 699        | 100269 |
|             | 10        | 4733.83   | 75.2  | 272        | 473861 | 1         | 389.92    | 27.8  | 490        | 22434 | 100       | 1886.9    | 217.5 | 675        | 88190  |
| C           | 10        | 3859.52   | 68    | 240        | 449348 | 100       | 677.2     | 69.8  | 606        | 33265 | 100       | 3636.24   | 380.3 | 701        | 164510 |
|             | 0.1       | 4432.04   | 86.3  | 305        | 409214 | 0.1       | 468.72    | 71.1  | 745        | 18790 | 1         | 2703.2    | 289.6 | 660        | 129173 |
|             | 10        | 3528.96   | 77.2  | 244        | 403900 | 10        | 356.9     | 40.3  | 597        | 17573 | 1         | 2794.01   | 406.1 | 724        | 124576 |
| D           | 1         | 5523.89   | 78.4  | 226        | 674625 | 10        | 6803      | 580.4 | 653        | 68307 | 1         | 3362.15   | 440.7 | 794        | 135345 |
|             | 0.1       | 4122.47   | 74.9  | 242        | 476341 | 10        | 562.06    | 102.4 | 773        | 22137 | 0.1       | 2949.04   | 324.2 | 734        | 127471 |
|             | 10        | 3694.3    | 71.4  | 244        | 425028 | 100       | 314.77    | 22.7  | 555        | 15304 | 10        | 2477.16   | 240.2 | 688        | 111842 |
| E           | 10        | 4021.5    | 72.8  | 238        | 466708 | 1         | 311.2     | 31.9  | 507        | 17850 | 0.1       | 2927.43   | 340.3 | 732        | 127126 |
|             | 10        | 3652.49   | 74.9  | 241        | 420527 | 10        | 276.34    | 24.4  | 509        | 15336 | 100       | 2753.51   | 304.8 | 698        | 123491 |
|             | 100       | 4383.48   | 92.7  | 300        | 411532 | 1         | 319.88    | 50.6  | 678        | 13911 | 10        | 2486.74   | 245.2 | 649        | 120376 |
| Without Dye | -         | 4749      | 98.6  | 616        | 18016  | -         | 50        | 789   | 214.14     | 8244  | -         | 9.6       | 639   | 138.3      | 5365   |
|             | -         | 7227      | 151.2 | 444        | 72144  | -         | 41.7      | 677   | 190.89     | 8778  | -         | 13.5      | 779   | 149.8      | 5113   |
|             | -         | 3589      | 95.4  | 701        | 11380  | -         | 27.8      | 692   | 146.67     | 6145  | -         | 9.9       | 751   | 91.69      | 3049   |

Laser Intensity (%): \*45, \*\*55, \*\*\*60

**Table S4** MALDI-MS data of casein analysed with and without dyes.

| Dye         | HCCA*     |           |      |            |         | DHB**     |           |       |            |         | SA***     |           |     |            |         |
|-------------|-----------|-----------|------|------------|---------|-----------|-----------|-------|------------|---------|-----------|-----------|-----|------------|---------|
|             | Dye Conc. | Intensity | S/N  | Resolution | Area    | Dye Conc. | Intensity | S/N   | Resolution | Area    | Dye Conc. | Intensity | S/N | Resolution | Area    |
| A           | 1         | 4212      | 72   | 63         | 1903453 | 1         | 5052      | 83.3  | 87         | 1983650 | 0.1       | 8769      | 189 | 131        | 2449170 |
|             | 10        | 3640      | 56.5 | 63         | 1803637 | 10        | 5030      | 88.7  | 89         | 1921070 | 100       | 7770      | 190 | 126        | 2281790 |
|             | 0.1       | 3043      | 66.8 | 61         | 1366026 | 1         | 2736      | 62.3  | 102        | 989079  | 10        | 8062      | 199 | 131        | 2246273 |
| B           | 1         | 5298      | 71.6 | 63         | 2439262 | 1         | 5387      | 100.8 | 101        | 1943502 | 1         | 11061     | 237 | 127        | 3132023 |
|             | 10        | 3505      | 65.5 | 66         | 1545741 | 1         | 5182      | 91.8  | 95         | 1879990 | 0.1       | 11350     | 262 | 136        | 3001613 |
|             | 1         | 3547      | 64.2 | 66         | 1524057 | 100       | 4373      | 91.6  | 101        | 1541748 | 10        | 9717      | 231 | 137        | 2761127 |
| C           | 10        | 4361      | 73   | 62         | 1921663 | 10        | 3955      | 74.4  | 91         | 1486441 | 10        | 14437     | 316 | 144        | 3547120 |
|             | 100       | 3681      | 60.7 | 66         | 1785661 | 100       | 3620      | 73.2  | 95         | 1351404 | 0.1       | 10330     | 213 | 132        | 2915734 |
|             | 0.1       | 3490      | 74.4 | 70         | 1443314 | 1         | 3438      | 69.5  | 93         | 1234921 | 1         | 10046     | 214 | 128        | 2880743 |
| D           | 1         | 4006      | 66   | 58         | 1847486 | 100       | 3066      | 58    | 95         | 1223985 | 10        | 12229     | 245 | 134        | 3346870 |
|             | 10        | 3784      | 64.2 | 58         | 1778733 | 1         | 2336      | 48.9  | 93         | 899892  | 10        | 7766      | 194 | 128        | 2206267 |
|             | 10        | 3264      | 63.8 | 63         | 1466729 | 100       | 2141      | 48.6  | 86         | 811407  | 1         | 6075      | 131 | 108        | 2135911 |
| E           | 0.1       | 3406      | 54.8 | 68         | 1552356 | 100       | 4639      | 80.4  | 89         | 1826347 | 0.1       | 10700     | 224 | 128        | 3087777 |
|             | 10        | 3456      | 57.2 | 67         | 1476640 | 10        | 4453      | 82.3  | 98         | 1587671 | 100       | 8671      | 191 | 128        | 2516837 |
|             | 10        | 2441      | 44.1 | 60         | 1200686 | 1         | 2632      | 55    | 91         | 1008935 | 1         | 8004      | 185 | 130        | 2286979 |
| Without Dye | -         | 212       | 9.5  | 53         | 109044  | -         | 105       | 5.9   | 90         | 70894   | -         | 27        | 1.5 | 14         | 25960   |
|             | -         | 180       | 8.4  | 46         | 92591   | -         | 205       | 9.3   | 63         | 98123   | -         | 30        | 1.7 | 24         | 30096   |
|             | -         | 73        | 4.8  | 59         | 36378   | -         | 365       | 15.9  | 67         | 163883  | -         | 95        | 4.8 | 29         | 56410   |

Laser Intensity (%): \*70, \*\*80, \*\*\*80



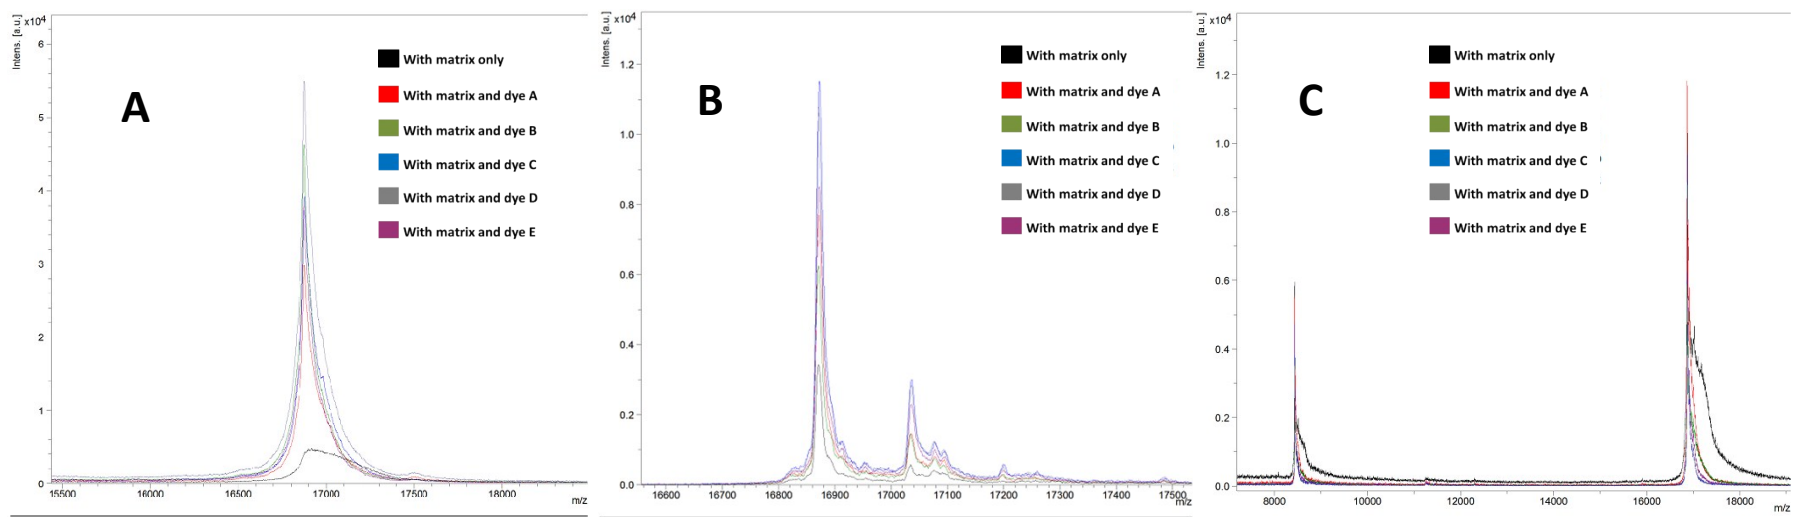

**Figure S1** MALDI-MS spectra of myoglobin analysed with matrices A) HCCA, B) SA and C) DHB with dyes (A-E) and without dyes.

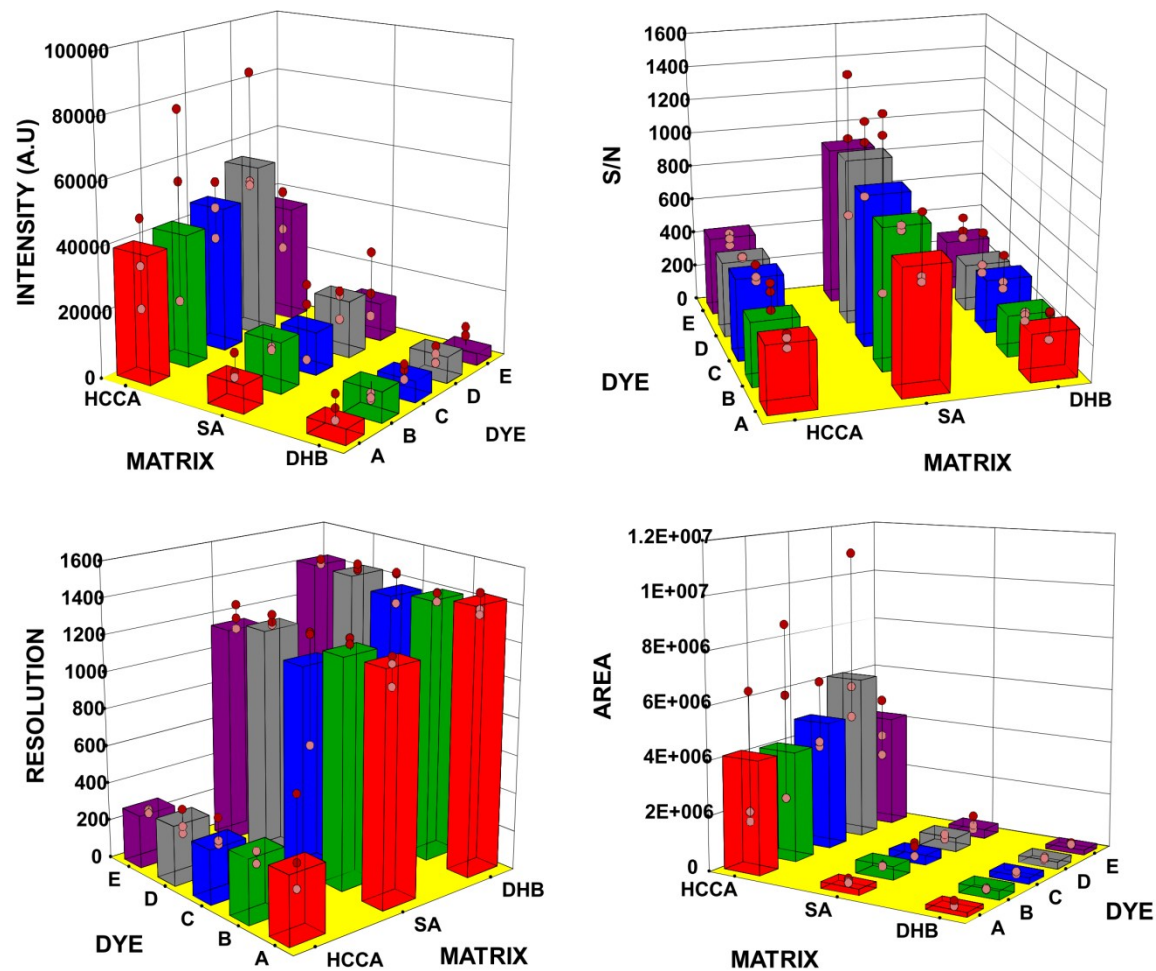

**Figure S2** Graphs showing A) Intensity, B) S/N ratio, C) Resolution, and D) Area of myoglobin observed in MADLI-MS spectra vs. Matrix and Dyes used for analysis.

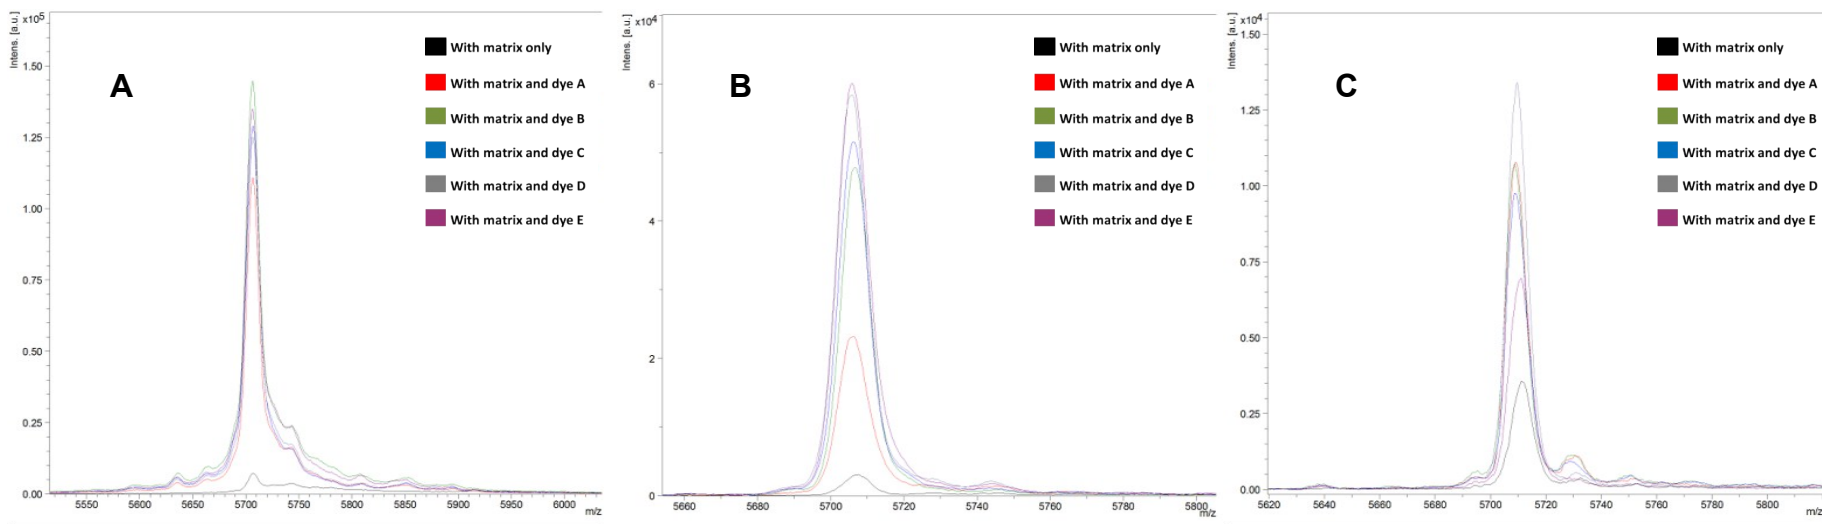

**Figure S3** MALDI-MS spectra of insulin analysed with matrices A) HCCA, B) SA and C) DHB with dyes (A-E) and without dyes.

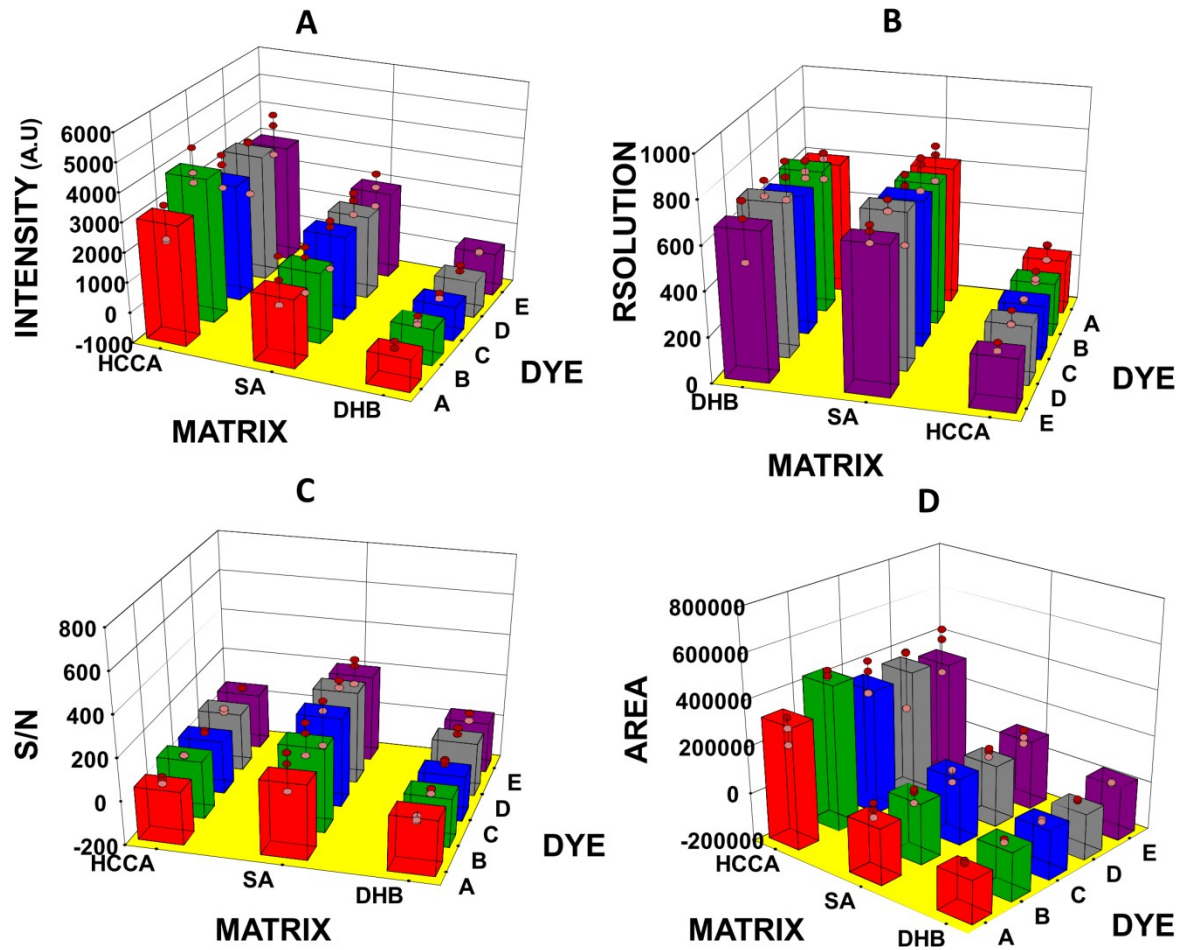

**Figure S4** Graphs showing A) Intensity, B) S/N ratio, C) Resolution, and D) Area of insulin observed in MADLI-MS spectra vs. Matrix and Dyes used for analysis.

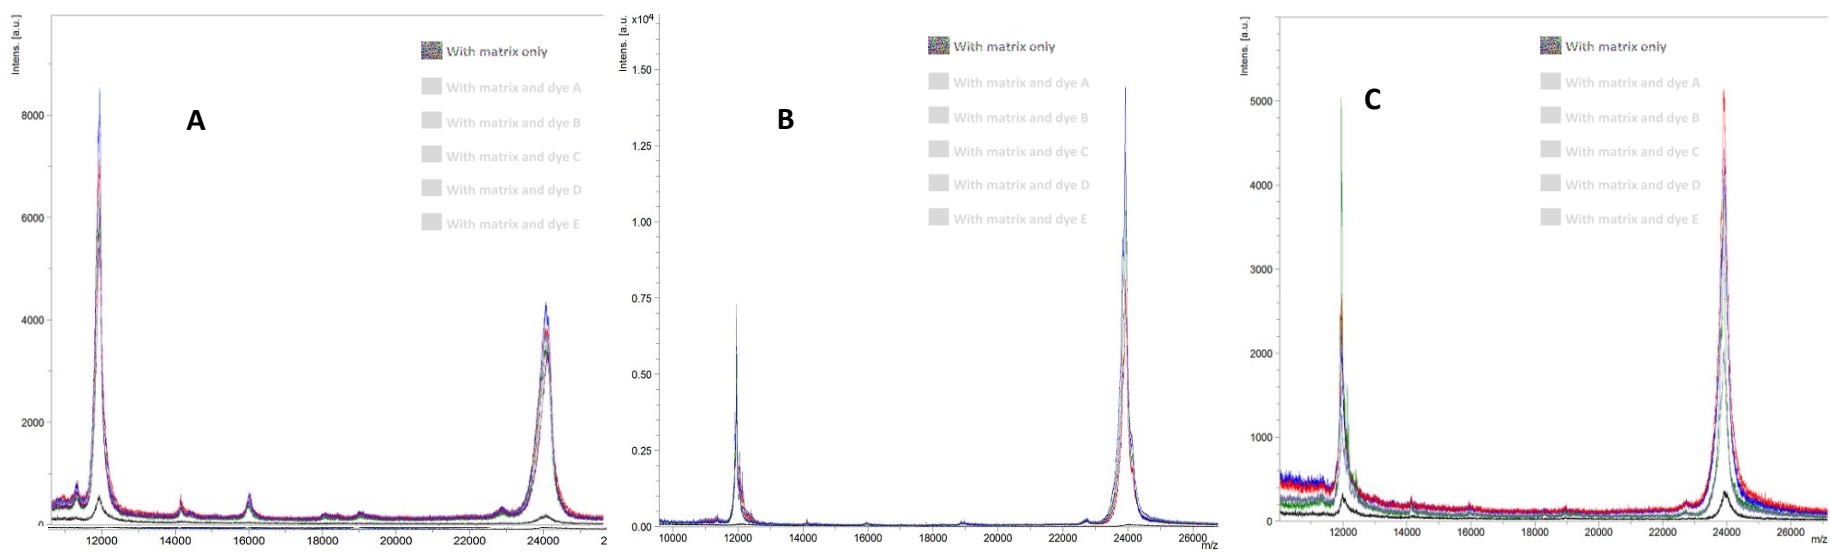

**Figure S5** MALDI-MS spectra of casein analysed with matrices A) HCCA, B) SA and C) DHB with dyes (A-E) and without dyes.

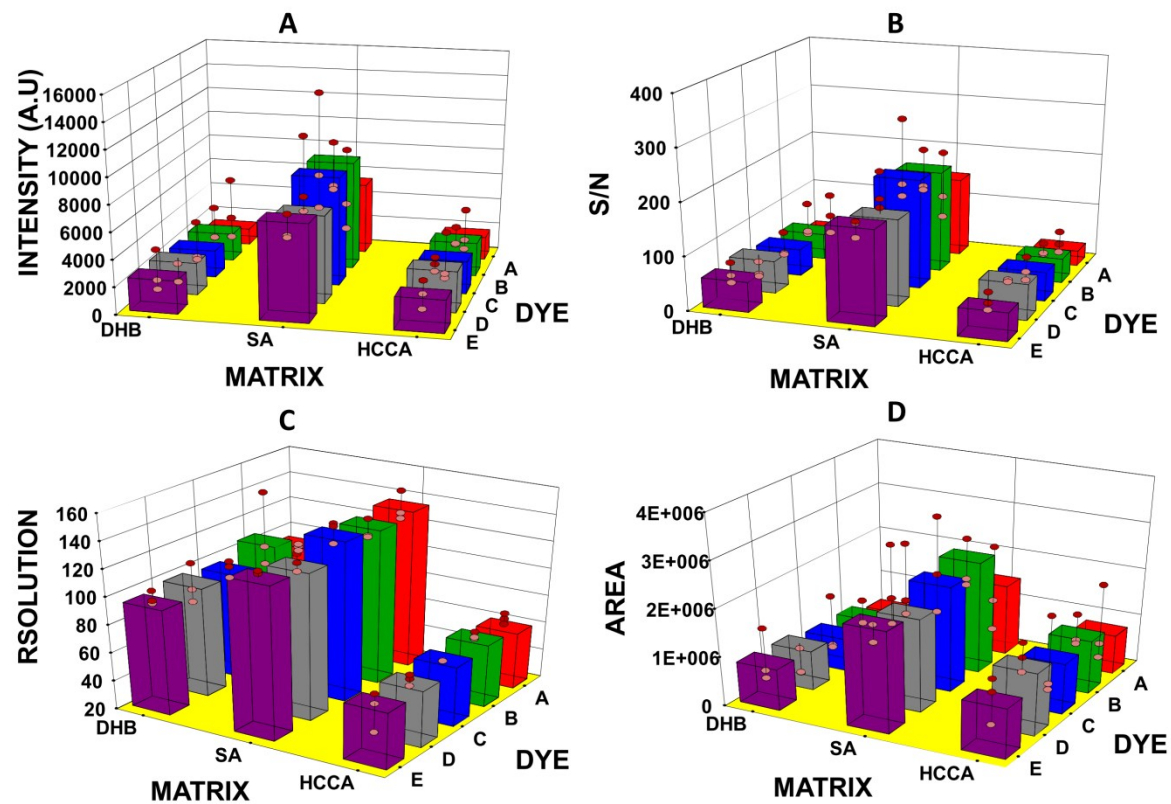

**Figure S6** Graphs showing A) Intensity, B) S/N ratio, C) Resolution, and D) Area of casein observed in MADLI-MS spectra vs. Matrix and Dyes used for analysis.

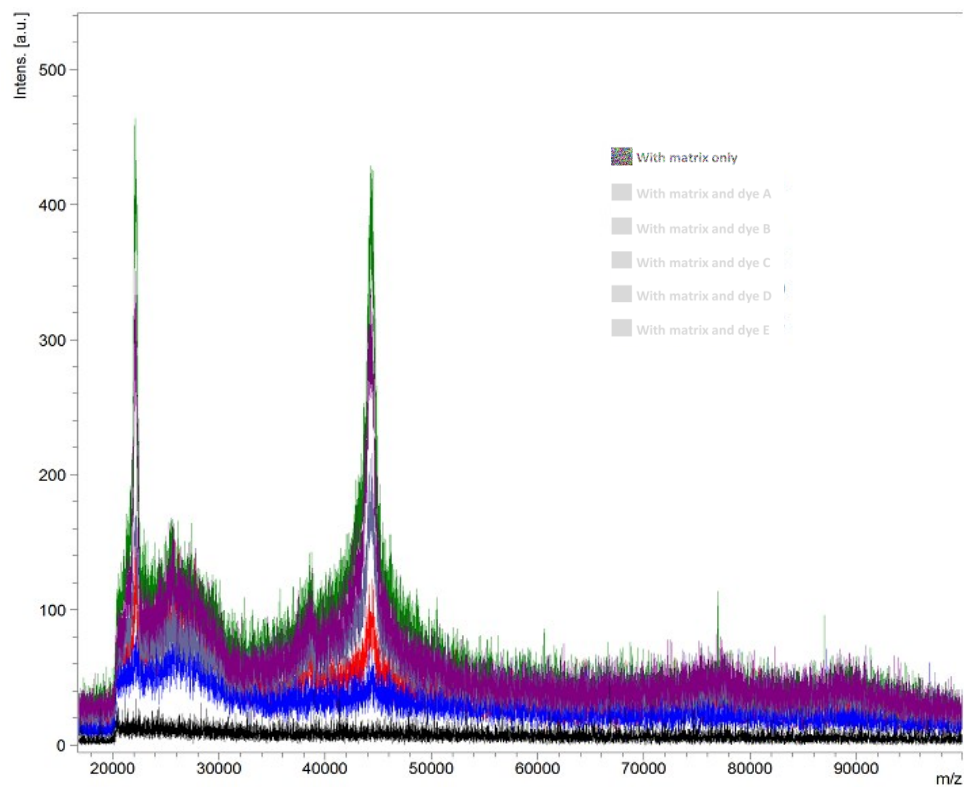

**Figure S7** MALDI-MS spectra of egg white sample analysed with HCCA with and without dyes (A-E) for the possible detection of proteins.

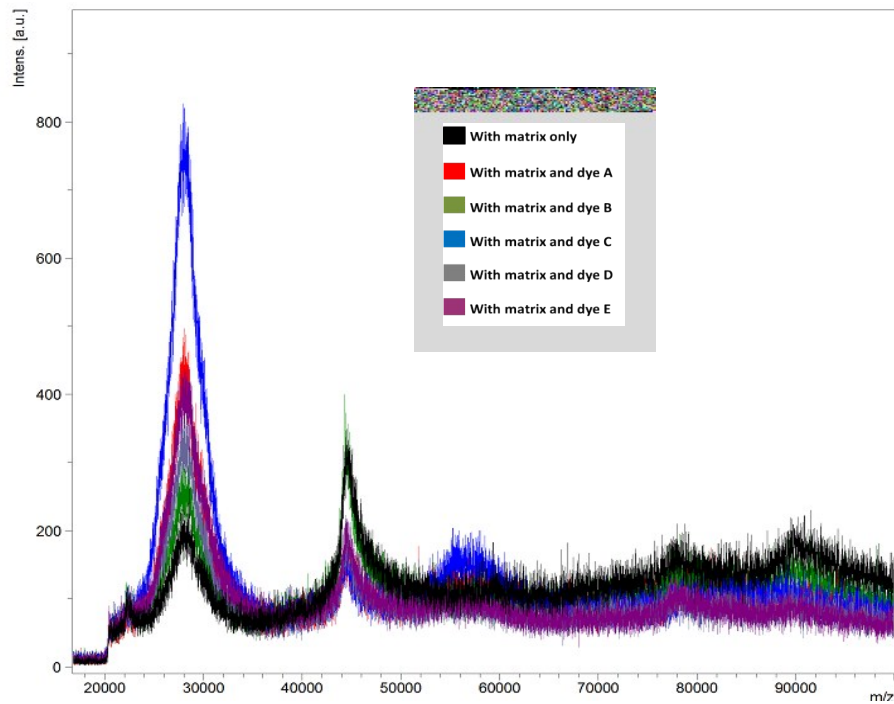

**Figure S8** MALDI-MS spectra of egg white sample analysed with DHB with and without dyes (A-E) for the possible detection of proteins.



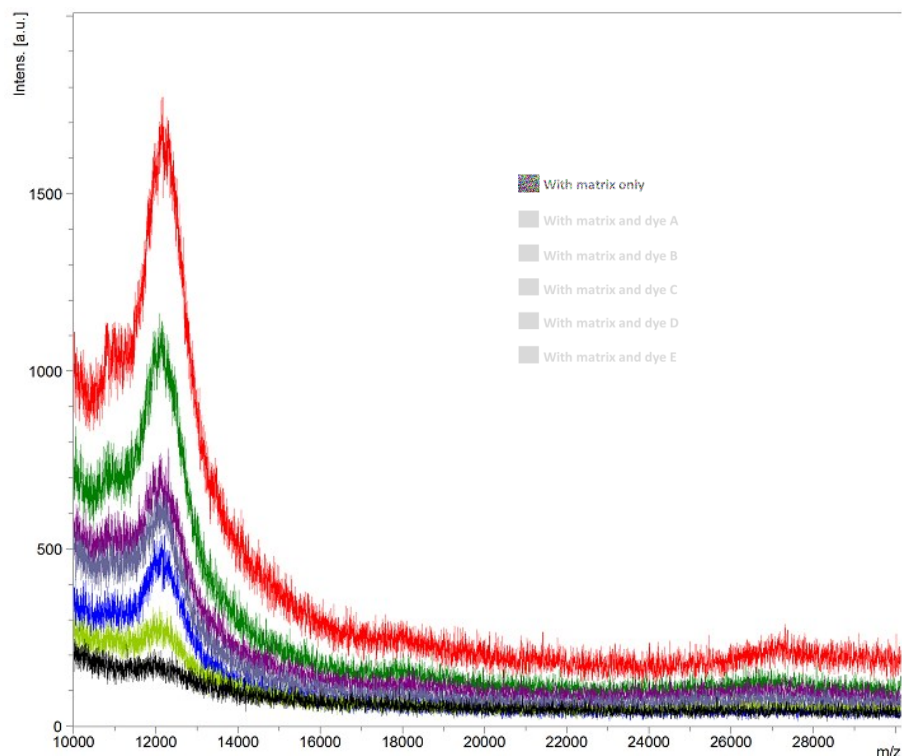

**Figure S9** MALDI-MS spectra of honey sample analysed with HCCA with and without dyes (A-E) for the possible detection of polydispersed carbohydrates/ proteins.

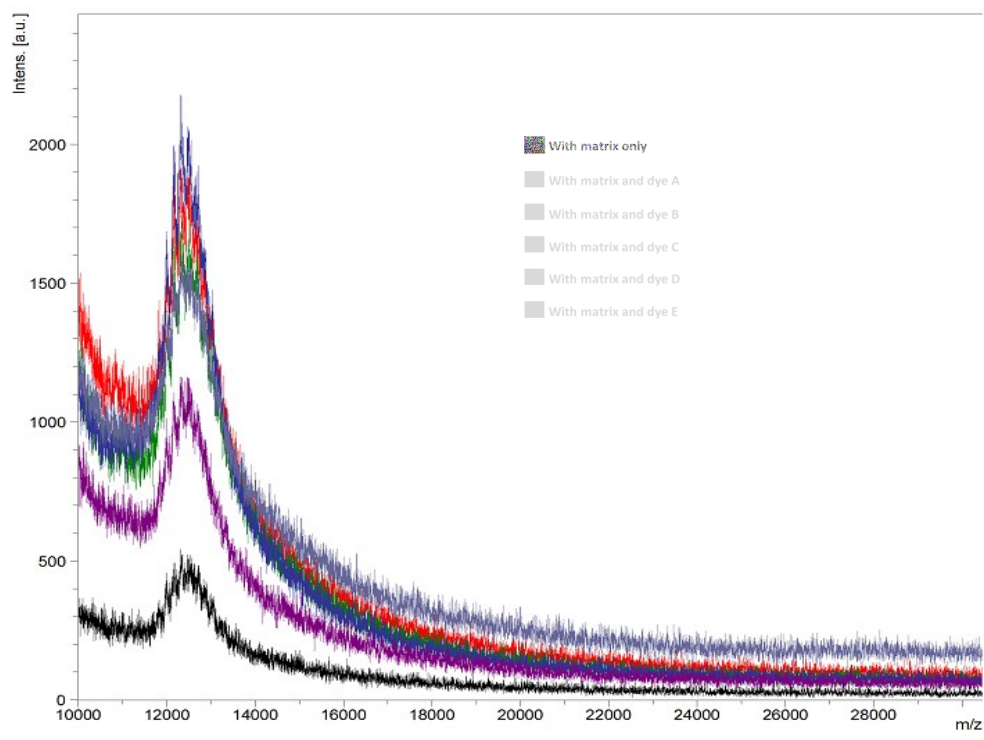

**Figure S10** MALDI-MS spectra of honey sample analysed with DHB with and without dyes (A-E) for the possible detection of polydispersed carbohydrates/ proteins.

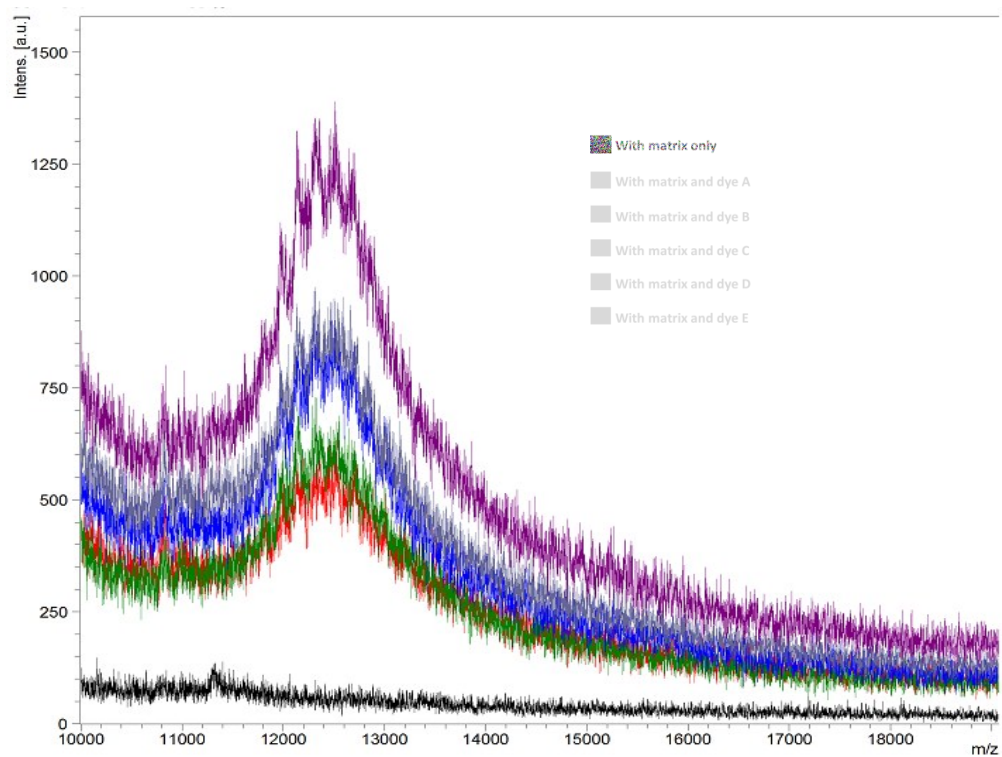

**Figure S11** MALDI-MS spectra of honey sample analysed with SA with and without dyes (A-E) for the possible detection of polydispersed carbohydrates/ proteins.

**Data S1.** Statistical Data for Bovine Serum Albumin analysis.

**Response 1 INTENSITY**

**Fixed Effects**

| Source            | Term | Error  | F     | p-value  |                 |
|-------------------|------|--------|-------|----------|-----------------|
|                   | df   | df     | Value | Prob > F |                 |
| Whole-plot        | 2    | 6.01   | 6.54  | 0.0310   | Significant     |
| <i>a-MATRIX</i>   | 2    | 6.01   | 6.54  | 0.0310   |                 |
| Subplot           | 33   | 137.01 | 0.72  | 0.8590   | not significant |
| <i>B-DYE</i>      | 4    | 137.01 | 1.06  | 0.3806   |                 |
| <i>C-DYE CONC</i> | 3    | 137.01 | 0.61  | 0.6102   |                 |
| <i>aB</i>         | 8    | 137.01 | 0.82  | 0.5862   |                 |
| <i>aC</i>         | 6    | 137.01 | 0.44  | 0.8476   |                 |
| <i>BC</i>         | 12   | 137.01 | 0.72  | 0.7344   |                 |

**Response 2 S/N**

**Fixed Effects**

| Source            | Term | Error  | F     | p-value  |                 |
|-------------------|------|--------|-------|----------|-----------------|
|                   | df   | df     | Value | Prob > F |                 |
| Whole-plot        | 2    | 6.01   | 13.47 | 0.0060   | significant     |
| <i>a-MATRIX</i>   | 2    | 6.01   | 13.47 | 0.0060   |                 |
| Subplot           | 33   | 137.03 | 1.09  | 0.3523   | not significant |
| <i>B-DYE</i>      | 4    | 137.03 | 1.38  | 0.2429   |                 |
| <i>C-DYE CONC</i> | 3    | 137.03 | 1.15  | 0.3299   |                 |
| <i>aB</i>         | 8    | 137.03 | 1.69  | 0.1053   |                 |
| <i>aC</i>         | 6    | 137.03 | 0.95  | 0.4621   |                 |
| <i>BC</i>         | 12   | 137.03 | 0.64  | 0.8087   |                 |

**Response 4 AREA**

**Fixed Effects**

| Source     | Term | Error | F     | p-value  |                 |
|------------|------|-------|-------|----------|-----------------|
|            | df   | df    | Value | Prob > F |                 |
| Whole-plot | 2    | 6.01  | 4.72  | 0.0587   | not significant |

|                   |    |        |      |        |                 |
|-------------------|----|--------|------|--------|-----------------|
| <i>a-MATRIX</i>   | 2  | 6.01   | 4.72 | 0.0587 |                 |
| Subplot           | 33 | 137.02 | 0.77 | 0.8133 | not significant |
| <i>B-DYE</i>      | 4  | 137.02 | 1.68 | 0.1591 |                 |
| <i>C-DYE CONC</i> | 3  | 137.02 | 0.60 | 0.6139 |                 |
| <i>aB</i>         | 8  | 137.02 | 0.89 | 0.5234 |                 |
| <i>aC</i>         | 6  | 137.02 | 0.44 | 0.8482 |                 |
| <i>BC</i>         | 12 | 137.02 | 0.57 | 0.8604 |                 |

### Response 3 RSOLUTION

#### Fixed Effects

| Source            | Term | Error  | F     | p-value  |             |
|-------------------|------|--------|-------|----------|-------------|
|                   | df   | df     | Value | Prob > F |             |
| Whole-plot        | 2    | 6.02   | 50.10 | 0.0002   | significant |
| <i>a-MATRIX</i>   | 2    | 6.02   | 50.10 | 0.0002   |             |
| Subplot           | 33   | 137.04 | 1.65  | 0.0243   | significant |
| <i>B-DYE</i>      | 4    | 137.05 | 0.67  | 0.6117   |             |
| <i>C-DYE CONC</i> | 3    | 137.05 | 2.15  | 0.0965   |             |
| <i>aB</i>         | 8    | 137.05 | 0.92  | 0.5042   |             |
| <i>aC</i>         | 6    | 137.05 | 2.31  | 0.0371   |             |
| <i>BC</i>         | 12   | 137.04 | 1.95  | 0.0336   |             |

**Data S2.** Statistical data for myoglobin analysis.

**Response 1 INTENSITY**

**Fixed Effects**

| Source            | Term | Error  | F      | p-value  |                 |
|-------------------|------|--------|--------|----------|-----------------|
|                   | df   | df     | Value  | Prob > F |                 |
| Whole-plot        | 2    | 6.01   | 117.62 | < 0.0001 | Significant     |
| <i>a-MATRIX</i>   | 2    | 6.01   | 117.62 | < 0.0001 |                 |
| Subplot           | 33   | 137.06 | 1.23   | 0.2092   | not significant |
| <i>B-DYE</i>      | 4    | 137.08 | 1.54   | 0.1945   |                 |
| <i>C-DYE CONC</i> | 3    | 137.08 | 0.87   | 0.4599   |                 |
| <i>aB</i>         | 8    | 137.07 | 1.28   | 0.2601   |                 |
| <i>aC</i>         | 6    | 137.08 | 2.00   | 0.0691   |                 |
| <i>BC</i>         | 12   | 137.07 | 0.78   | 0.6731   |                 |

**Response 2 S/N**

**Fixed Effects**

| Source            | Term | Error  | F     | p-value  |                 |
|-------------------|------|--------|-------|----------|-----------------|
|                   | df   | df     | Value | Prob > F |                 |
| Whole-plot        | 2    | 6.02   | 64.06 | < 0.0001 | significant     |
| <i>a-MATRIX</i>   | 2    | 6.02   | 64.06 | < 0.0001 |                 |
| Subplot           | 33   | 137.04 | 0.66  | 0.9201   | not significant |
| <i>B-DYE</i>      | 4    | 137.05 | 1.04  | 0.3909   |                 |
| <i>C-DYE CONC</i> | 3    | 137.05 | 0.30  | 0.8228   |                 |
| <i>aB</i>         | 8    | 137.05 | 0.95  | 0.4775   |                 |
| <i>aC</i>         | 6    | 137.05 | 0.52  | 0.7961   |                 |
| <i>BC</i>         | 12   | 137.04 | 0.49  | 0.9160   |                 |

**Response 3 RSOLUTION**

**Fixed Effects**

| Source          | Term | Error  | F       | p-value  |                 |
|-----------------|------|--------|---------|----------|-----------------|
|                 | df   | df     | Value   | Prob > F |                 |
| Whole-plot      | 2    | 5.99   | 1419.34 | < 0.0001 | significant     |
| <i>a-MATRIX</i> | 2    | 5.99   | 1419.34 | < 0.0001 |                 |
| Subplot         | 33   | 137.04 | 0.89    | 0.6415   | not significant |

|                   |    |        |      |        |
|-------------------|----|--------|------|--------|
| <i>B-DYE</i>      | 4  | 137.04 | 1.45 | 0.2208 |
| <i>C-DYE CONC</i> | 3  | 137.05 | 0.90 | 0.4433 |
| <i>aB</i>         | 8  | 137.04 | 0.90 | 0.5173 |
| <i>aC</i>         | 6  | 137.04 | 0.86 | 0.5276 |
| <i>BC</i>         | 12 | 137.04 | 0.70 | 0.7522 |

#### Response 4 AREA

##### Fixed Effects

| Source            | Term | Error  | F      | p-value  |                 |
|-------------------|------|--------|--------|----------|-----------------|
|                   | df   | df     | Value  | Prob > F |                 |
| Whole-plot        | 2    | 6.06   | 375.45 | < 0.0001 | Significant     |
| <i>a-MATRIX</i>   | 2    | 6.06   | 375.45 | < 0.0001 |                 |
| Subplot           | 33   | 137.11 | 1.28   | 0.1635   | not significant |
| <i>B-DYE</i>      | 4    | 137.12 | 1.27   | 0.2857   |                 |
| <i>C-DYE CONC</i> | 3    | 137.12 | 1.35   | 0.2623   |                 |
| <i>aB</i>         | 8    | 137.12 | 1.29   | 0.2557   |                 |
| <i>aC</i>         | 6    | 137.12 | 1.81   | 0.1015   |                 |
| <i>BC</i>         | 12   | 137.12 | 0.97   | 0.4834   |                 |

**Data S3.** Statistical data for casein analysis.

**Response 1 INTENSITY**

**Fixed Effects**

| <b>Source</b>     | <b>Term</b> | <b>Error</b> | <b>F</b>     | <b>p-value</b>     |             |
|-------------------|-------------|--------------|--------------|--------------------|-------------|
|                   | <b>df</b>   | <b>df</b>    | <b>Value</b> | <b>Prob &gt; F</b> |             |
| Whole-plot        | 2           | 6.00         | 31.63        | 0.0007             | significant |
| <i>a-MATRIX</i>   | 2           | 6.00         | 31.63        | 0.0007             |             |
| Subplot           | 33          | 135.11       | 1.53         | 0.0477             | significant |
| <i>B-DYE</i>      | 4           | 135.18       | 2.52         | 0.0444             |             |
| <i>C-DYE CONC</i> | 3           | 135.17       | 3.62         | 0.0148             |             |
| <i>aB</i>         | 8           | 135.17       | 0.64         | 0.7392             |             |
| <i>aC</i>         | 6           | 135.16       | 1.29         | 0.2648             |             |
| <i>BC</i>         | 12          | 135.09       | 1.34         | 0.2058             |             |

**Response 2 S/N**

**REML Analysis for selected model**

**Fixed Effects**

| <b>Source</b>     | <b>Term</b> | <b>Error</b> | <b>F</b>     | <b>p-value</b>     |             |
|-------------------|-------------|--------------|--------------|--------------------|-------------|
|                   | <b>df</b>   | <b>df</b>    | <b>Value</b> | <b>Prob &gt; F</b> |             |
| Whole-plot        | 2           | 6.04         | 74.33        | < 0.0001           | significant |
| <i>a-MATRIX</i>   | 2           | 6.04         | 74.33        | < 0.0001           |             |
| Subplot           | 33          | 135.14       | 1.86         | 0.0073             | significant |
| <i>B-DYE</i>      | 4           | 135.20       | 2.94         | 0.0229             |             |
| <i>C-DYE CONC</i> | 3           | 135.19       | 3.65         | 0.0143             |             |
| <i>aB</i>         | 8           | 135.19       | 1.55         | 0.1454             |             |
| <i>aC</i>         | 6           | 135.18       | 1.81         | 0.1011             |             |
| <i>BC</i>         | 12          | 135.12       | 1.21         | 0.2814             |             |

Values of "Prob > F" less than 0.0500 indicate model terms are significant.

**Response 3 RSOLUTION**

**Fixed Effects**



| <b>Source</b>     | <b>Term</b> | <b>Error</b> | <b>F</b>     | <b>p-value</b>     |                 |
|-------------------|-------------|--------------|--------------|--------------------|-----------------|
|                   | <b>df</b>   | <b>df</b>    | <b>Value</b> | <b>Prob &gt; F</b> |                 |
| Whole-plot        | 2           | 6.20         | 744.17       | < 0.0001           | Significant     |
| <i>a-MATRIX</i>   | 2           | 6.20         | 744.17       | < 0.0001           |                 |
| Subplot           | 33          | 135.42       | 1.25         | 0.1845             | not significant |
| <i>B-DYE</i>      | 4           | 135.58       | 1.32         | 0.2669             |                 |
| <i>C-DYE CONC</i> | 3           | 135.55       | 1.34         | 0.2645             |                 |
| <i>aB</i>         | 8           | 135.56       | 1.79         | 0.0844             |                 |
| <i>aC</i>         | 6           | 135.54       | 0.82         | 0.5592             |                 |
| <i>BC</i>         | 12          | 135.40       | 1.08         | 0.3858             |                 |

#### Response 4 AREA

##### Fixed Effects

| <b>Source</b>     | <b>Term</b> | <b>Error</b> | <b>F</b>     | <b>p-value</b>     |                 |
|-------------------|-------------|--------------|--------------|--------------------|-----------------|
|                   | <b>df</b>   | <b>df</b>    | <b>Value</b> | <b>Prob &gt; F</b> |                 |
| Whole-plot        | 2           | 5.93         | 17.49        | 0.0033             | significant     |
| <i>a-MATRIX</i>   | 2           | 5.93         | 17.49        | 0.0033             |                 |
| Subplot           | 33          | 135.06       | 1.44         | 0.0762             | not significant |
| <i>B-DYE</i>      | 4           | 135.14       | 2.18         | 0.0741             |                 |
| <i>C-DYE CONC</i> | 3           | 135.13       | 3.29         | 0.0227             |                 |
| <i>aB</i>         | 8           | 135.13       | 0.50         | 0.8514             |                 |
| <i>aC</i>         | 6           | 135.12       | 1.21         | 0.3058             |                 |
| <i>BC</i>         | 12          | 135.04       | 1.43         | 0.1613             |                 |

**Data S4.** Statistical data for insulin analysis.

#### Response 1 Intensity

### Fixed Effects

| Source            | Term | Error  | F      | p-value  |                 |
|-------------------|------|--------|--------|----------|-----------------|
|                   | df   | df     | Value  | Prob > F |                 |
| Whole-plot        | 2    | 6.31   | 748.08 | < 0.0001 | significant     |
| <i>a-MATRIX</i>   | 2    | 6.31   | 748.08 | < 0.0001 |                 |
| Subplot           | 33   | 136.71 | 0.97   | 0.5169   | not significant |
| <i>B-DYE</i>      | 4    | 136.83 | 1.07   | 0.3735   |                 |
| <i>C-DYE CONC</i> | 3    | 136.83 | 0.029  | 0.9932   |                 |
| <i>aB</i>         | 8    | 136.82 | 2.05   | 0.0455   |                 |
| <i>aC</i>         | 6    | 136.83 | 0.69   | 0.6543   |                 |
| <i>BC</i>         | 12   | 136.80 | 0.58   | 0.8560   |                 |

### Response 2 S/N

#### Fixed Effects

| Source            | Term | Error  | F      | p-value  |             |
|-------------------|------|--------|--------|----------|-------------|
|                   | df   | df     | Value  | Prob > F |             |
| Whole-plot        | 2    | 5.63   | 192.17 | < 0.0001 | significant |
| <i>a-MATRIX</i>   | 2    | 5.63   | 192.17 | < 0.0001 |             |
| Subplot           | 33   | 135.81 | 1.54   | 0.0454   | significant |
| <i>B-DYE</i>      | 4    | 135.86 | 0.49   | 0.7448   |             |
| <i>C-DYE CONC</i> | 3    | 135.86 | 1.75   | 0.1605   |             |
| <i>aB</i>         | 8    | 135.85 | 1.61   | 0.1287   |             |
| <i>aC</i>         | 6    | 135.85 | 0.97   | 0.4481   |             |
| <i>BC</i>         | 12   | 135.84 | 2.04   | 0.0250   |             |

### Response 3 RSOLUTION

#### Fixed Effects

| Source            | Term | Error  | F      | p-value  |                 |
|-------------------|------|--------|--------|----------|-----------------|
|                   | df   | df     | Value  | Prob > F |                 |
| Whole-plot        | 2    | 5.88   | 517.07 | < 0.0001 | significant     |
| <i>a-MATRIX</i>   | 2    | 5.88   | 517.07 | < 0.0001 |                 |
| Subplot           | 33   | 136.03 | 1.01   | 0.4684   | not significant |
| <i>B-DYE</i>      | 4    | 136.06 | 1.93   | 0.1081   |                 |
| <i>C-DYE CONC</i> | 3    | 136.06 | 0.34   | 0.7981   |                 |
| <i>aB</i>         | 8    | 136.06 | 0.54   | 0.8272   |                 |
| <i>aC</i>         | 6    | 136.06 | 2.23   | 0.0438   |                 |
| <i>BC</i>         | 12   | 136.05 | 0.59   | 0.8487   |                 |

## Response 4 AREA

These rows were ignored for this analysis.

61, 82

### REML Analysis for selected model

| Source            | Term | Error  | F      | p-value  |                 |
|-------------------|------|--------|--------|----------|-----------------|
|                   | df   | df     | Value  | Prob > F |                 |
| Whole-plot        | 2    | 6.21   | 644.66 | < 0.0001 | significant     |
| <i>a-MATRIX</i>   | 2    | 6.21   | 644.66 | < 0.0001 |                 |
| Subplot           | 33   | 136.46 | 1.23   | 0.2082   | not significant |
| <i>B-DYE</i>      | 4    | 136.53 | 1.66   | 0.1639   |                 |
| <i>C-DYE CONC</i> | 3    | 136.53 | 0.60   | 0.6129   |                 |
| <i>aB</i>         | 8    | 136.52 | 2.11   | 0.0392   |                 |
| <i>aC</i>         | 6    | 136.53 | 1.08   | 0.3791   |                 |
| <i>BC</i>         | 12   | 136.51 | 0.70   | 0.7455   |                 |
